# Supplementary material
Source: PubMed Central journal article supplement (PMC5933551)
Supplement: Supplementary_Tables.pdf [file Supplementary_Tables.pdf]

Supplementary Tables

# **Non-vitamin K Antagonist Oral Anticoagulant Use in Patients with Renal Impairment**

Alexander G.G. Turpie MD, Daniel Purdham PhD, Antonio  
Ciaccia MSc

**Corresponding Author:**

**Alexander G.G. Turpie MD**

<sup>a</sup>Suite 802

19 Brant Street

Toronto, ON, Canada, M5V 2L2

Phone: 1 905 929 4385

Fax: N/A

Email: [turpiea@mcmaster.ca](mailto:turpiea@mcmaster.ca)

**Supplemental Table S1: NOAC indications for major markets**

|        | <b>Dabigatran</b> |     |    |     | <b>Apixaban</b> |     |    |     | <b>Edoxaban</b> |     |    |     | <b>Rivaroxaban</b> |     |    |     |
|--------|-------------------|-----|----|-----|-----------------|-----|----|-----|-----------------|-----|----|-----|--------------------|-----|----|-----|
|        | AF                | VTE | OS | ACS | AF              | VTE | OS | ACS | AF              | VTE | OS | ACS | AF                 | VTE | OS | ACS |
| Canada | ✓                 | ✓   | ✓  | -   | ✓               | ✓   | ✓  | -   | ✓               | ✓   | -  | -   | ✓                  | ✓   | ✓  | -   |
| US     | ✓                 | ✓   | ✓  | -   | ✓               | ✓   | ✓  | -   | ✓               | ✓   | -  | -   | ✓                  | ✓   | ✓  | -   |
| EU     | ✓                 | ✓   | ✓  | -   | ✓               | ✓   | ✓  | -   | ✓               | ✓   | -  | -   | ✓                  | ✓   | ✓  | ✓   |
| Japan  | ✓                 | -   | -  | -   | ✓               | ✓   | -  | -   | ✓               | ✓   | ✓  | -   | ✓                  | ✓   | -  | -   |

ACS: acute coronary syndrome; AF: atrial fibrillation; OS: orthopedic surgery; VTE: venous thromboembolism.

**Supplemental Table S2: NOAC Dose Recommendations for AF in Major Jurisdictions**

| Drug        | Canada                                                                                                                                                                                                                                                                                                                                                                                                                   | United States                                                                                                                                                                                                                                                                                                                                                    | Europe                                                                                                                                                                                                                                                                                                                                                                                                                                                                  |
|-------------|--------------------------------------------------------------------------------------------------------------------------------------------------------------------------------------------------------------------------------------------------------------------------------------------------------------------------------------------------------------------------------------------------------------------------|------------------------------------------------------------------------------------------------------------------------------------------------------------------------------------------------------------------------------------------------------------------------------------------------------------------------------------------------------------------|-------------------------------------------------------------------------------------------------------------------------------------------------------------------------------------------------------------------------------------------------------------------------------------------------------------------------------------------------------------------------------------------------------------------------------------------------------------------------|
| Dabigatran  | <ul style="list-style-type: none"> <li>Recommended dose 150 mg BID</li> <li>Patients <math>\geq 80</math> years or those at higher risk of bleeding, including elderly <math>\geq 75</math> years with <math>\geq 1</math> bleeding risk factor: recommended dose 110 mg BID</li> <li>Contraindicated if eCrCl <math>&lt; 30</math> mL/min</li> </ul>                                                                    | <ul style="list-style-type: none"> <li>CrCl <math>&gt; 30</math> mL/min: 150 mg BID</li> <li>CrCl 15-30 mL/min: 75 mg BID</li> <li>Not recommended if CrCl <math>&lt; 15</math> mL/min or on dialysis</li> </ul>                                                                                                                                                 | <ul style="list-style-type: none"> <li>Recommended dose 150 mg BID</li> <li>Patients <math>\geq 80</math> years or who receive concomitant verapamil: recommended dose 110 mg BID</li> <li>Contraindicated if CrCl <math>&lt; 30</math> mL/min</li> </ul>                                                                                                                                                                                                               |
| Apixaban    | <ul style="list-style-type: none"> <li>Recommended dose 5 mg BID</li> <li>Patients with at least 2 of the following: <math>\geq 80</math> years, body weight <math>\leq 60</math> kg, or sCr <math>\geq 133</math> <math>\mu\text{mol/L}</math> (1.5 mg/dL): recommended dose 2.5 mg BID</li> <li>No dosing recommendation for CrCl 15-24 mL/min</li> <li>Not recommended if CrCl <math>&lt; 15</math> mL/min</li> </ul> | <ul style="list-style-type: none"> <li>Recommended dose 5 mg BID</li> <li>Patients with at least 2 of the following: <math>\geq 80</math> years, body weight <math>\leq 60</math> kg, or sCr <math>\geq 133</math> <math>\mu\text{mol/L}</math> (1.5 mg/dL): recommended dose 2.5 mg BID</li> <li>Not recommended if CrCl <math>&lt; 15</math> mL/min</li> </ul> | <ul style="list-style-type: none"> <li>Recommended dose 5 mg BID</li> <li>Patients with at least 2 of the following: <math>\geq 80</math> years, body weight <math>\leq 60</math> kg, sCr <math>\geq 133</math> <math>\mu\text{mol/L}</math> (1.5 mg/dL): recommended dose 2.5 mg BID</li> <li>Patients with CrCl 15-29 mL/min: recommended dose 2.5 mg BID</li> <li>Not recommended if CrCl <math>&lt; 15</math> mL/min, or in patients undergoing dialysis</li> </ul> |
| Edoxaban    | <ul style="list-style-type: none"> <li>Recommended dose 60 mg OD</li> <li>In patients with moderate renal impairment (CrCl 30-50 mL/min), weight <math>\leq 60</math> kg, or concomitant use of P-gp inhibitors (except amiodarone and verapamil) recommended dose is 30 mg OD</li> <li>Not recommended in patients with CrCl <math>&lt; 30</math> mL/min</li> </ul>                                                     | <ul style="list-style-type: none"> <li>CrCl <math>&gt; 50</math> to <math>\leq 95</math> mL/min: 60 mg OD</li> <li>CrCl 15-50 mL/min: 30 mg OD</li> <li>Not recommended/avoid use if CrCl <math>&gt; 95</math> mL/min</li> </ul>                                                                                                                                 | <ul style="list-style-type: none"> <li>Recommended dose 60 mg OD</li> <li>Patients with <math>\geq 1</math> of the following: CrCl 15-50 mL/min, body weight <math>\leq 60</math> kg, concomitant use of P-gp inhibitors (ciclosporin, dronedarone, erythromycin, or ketoconazole): recommended dose 30 mg OD</li> <li>Not recommended if CrCl <math>&lt; 15</math> mL/min or on dialysis</li> </ul>                                                                    |
| Rivaroxaban | <ul style="list-style-type: none"> <li>Recommended dose 20 mg OD</li> <li>CrCl 30-49 mL/min: 15 mg OD</li> <li>Not recommended if CrCl <math>&lt; 30</math> mL/min</li> </ul>                                                                                                                                                                                                                                            | <ul style="list-style-type: none"> <li>Recommended dose 20 mg OD</li> <li>CrCl 15-50 mL/min: 15 mg OD</li> <li>Avoid use if CrCl <math>&lt; 15</math> mL/min</li> </ul>                                                                                                                                                                                          | <ul style="list-style-type: none"> <li>Recommended dose 20 mg OD</li> <li>CrCl 15-49 mL/min: 15 mg OD</li> <li>Not recommended if CrCl <math>&lt; 15</math> mL/min</li> </ul>                                                                                                                                                                                                                                                                                           |

**Supplemental Table S3: NOAC Dose Recommendations for VTE in Major Jurisdictions**

| Drug        | Canada                                                                                                                                                                                                                                                                                                                                                                                                  | United States                                                                                                                                                                                                                                                                                                                       | Europe                                                                                                                                                                                                                                                                                                                                                                                                                                         |
|-------------|---------------------------------------------------------------------------------------------------------------------------------------------------------------------------------------------------------------------------------------------------------------------------------------------------------------------------------------------------------------------------------------------------------|-------------------------------------------------------------------------------------------------------------------------------------------------------------------------------------------------------------------------------------------------------------------------------------------------------------------------------------|------------------------------------------------------------------------------------------------------------------------------------------------------------------------------------------------------------------------------------------------------------------------------------------------------------------------------------------------------------------------------------------------------------------------------------------------|
| Dabigatran  | <ul style="list-style-type: none"> <li>Recommended dose 150 mg BID following 5-10 days with parenteral anticoagulant</li> <li>Patients <math>\geq 80</math> years or those at higher risk of bleeding, including elderly <math>\geq 75</math> years with <math>\geq 1</math> bleeding risk factor: recommended dose 110 mg BID</li> <li>Contraindicated if eCrCl <math>&lt; 30</math> mL/min</li> </ul> | <ul style="list-style-type: none"> <li>CrCl <math>&gt; 30</math> mL/min: 150 mg BID, after 5-10 days of parenteral AC</li> <li>Not recommended if CrCl <math>\leq 30</math> mL/min or on dialysis</li> <li>Avoid co-administration of dabigatran and P-gp inhibitors in patients with CrCl <math>&lt; 50</math> mL/min</li> </ul>   | <ul style="list-style-type: none"> <li>Recommended dose 150 mg BID following Tx with a parenteral AC for at least 5 days</li> <li>Patients <math>\geq 80</math> years or who receive concomitant verapamil, recommended dose 110 mg BID</li> <li>Contraindicated if CrCl <math>&lt; 30</math> mL/min</li> </ul>                                                                                                                                |
| Apixaban    | <ul style="list-style-type: none"> <li>10 mg BID x 7 days, then 5 mg BID</li> <li>Continued prevention of recurrent DVT and PE following at least 6 months of Tx for DVT or PE: 2.5 mg BID</li> <li>Use with caution if eCrCl 15-29 mL/min</li> <li>Not recommended if CrCl <math>&lt; 15</math> mL/min</li> </ul>                                                                                      | <ul style="list-style-type: none"> <li>10 mg BID x 7 days, then 5 mg BID</li> <li>Reduction in the risk of recurrence of DVT and PE following at least 6 months of treatment for DVT or PE: 2.5 mg BID</li> <li>Not Recommended if CrCl <math>&lt; 15</math> mL/min</li> </ul>                                                      | <ul style="list-style-type: none"> <li>Tx of DVT/PE: 10 mg BID x 7 days, then 5 mg BID</li> <li>Prevention of recurrent DVT and/or PE following completion of 6 months of Tx for DVT or PE: 2.5 mg BID</li> <li>To be used with caution if CrCl 15-29 mL/min</li> <li>Not recommended if CrCl <math>&lt; 15</math> mL/min, or in patients undergoing dialysis</li> </ul>                                                                       |
| Edoxaban    | <ul style="list-style-type: none"> <li>Recommended dose 60 mg OD following initial use of a parenteral anticoagulant for 5-10 days</li> <li>Patients with moderate renal impairment (CrCl 30-50 mL/min), weight <math>\leq 60</math> kg, or concomitant use of P-gp inhibitors (except amiodarone and verapamil) recommended dose is 30 mg OD</li> </ul>                                                | <ul style="list-style-type: none"> <li>Recommended dose 60 mg OD following 5-10 days of initial therapy with a parenteral anticoagulant</li> <li>Patients <math>\leq 60</math> kg or CrCl 15-50 mL/min or using certain P-gp inhibitors: 30 mg OD</li> <li>Not recommended/avoid use if CrCl <math>&gt; 95</math> mL/min</li> </ul> | <ul style="list-style-type: none"> <li>Recommended dose 60 mg OD following at least 5 days of parenteral anticoagulant</li> <li>Patients with <math>\geq 1</math> of the following: CrCl 15-50 mL/min, <math>\leq 60</math> kg, concomitant use of P-gp inhibitors (cyclosporin, dronedarone, erythromycin, or ketoconazole): recommended dose 30 mg OD</li> <li>Not recommended if CrCl <math>&lt; 15</math> mL/min or on dialysis</li> </ul> |
| Rivaroxaban | <ul style="list-style-type: none"> <li>15 mg BID x 21 days, then 20 mg OD</li> <li>Not recommended if CrCl <math>&lt; 30</math> mL/min</li> </ul>                                                                                                                                                                                                                                                       | <ul style="list-style-type: none"> <li>15 mg BID x 21 days, then 20 mg OD</li> <li>Avoid use if CrCl <math>&lt; 30</math> mL/min</li> </ul>                                                                                                                                                                                         | <ul style="list-style-type: none"> <li>15 mg BID x 21 days, then 20 mg OD</li> <li>CrCl 15-49 mL/min same as above. Consider dose reduction if risk of bleeding outweighs the risk of recurrent DVT and PE (then 15 mg BID x 21 days, then 15 mg OD)</li> <li>Not recommended if CrCl <math>&lt; 15</math> mL/min</li> </ul>                                                                                                                   |

**Supplemental Table S4: First ischemic stroke rates and outcomes in NOAC trials by renal function subgroup – FDA analysis**

| Drug, Trial                     | CrCl<br>(mL/min) | First Stroke/SSE<br>Rates (%/yr) |          | Hazard Ratio<br>NOAC vs.<br>Warfarin |
|---------------------------------|------------------|----------------------------------|----------|--------------------------------------|
|                                 |                  | NOAC                             | Warfarin |                                      |
| Dabigatran 150 mg,<br>RE-LY     | >50 to <80       | 0.94                             | 1.22     | 0.77                                 |
|                                 | ≥80              | 0.61                             | 0.72     | 0.84                                 |
| Apixaban,<br>ARISTOTLE          | >50 to <80       | 0.77                             | 0.89     | 0.87                                 |
|                                 | ≥80              | 0.69                             | 0.51     | 1.35                                 |
| Edoxaban 60/30 mg,<br>ENGAGE AF | >50 to <80       | 1.21                             | 1.49     | 0.81                                 |
|                                 | ≥80              | 1.02                             | 0.73     | 1.40                                 |
| Rivaroxaban,<br>ROCKET-AF       | >50 to <80       | 1.39                             | 1.70     | 0.82                                 |
|                                 | ≥80              | 0.94                             | 0.87     | 1.07                                 |

Adapted from: FDA. Cardiovascular and Renal Drugs Advisory Committee Edoxaban

NDA 206316. Statistical Considerations, ENGAGE AF Trial. 2014.

[http://www.fda.gov/downloads/AdvisoryCommittees/CommitteesMeetingMaterials/](http://www.fda.gov/downloads/AdvisoryCommittees/CommitteesMeetingMaterials/Drugs/CardiovascularandRenalDrugsAdvisoryCommittee/UCM421612.pdf)

[Drugs/CardiovascularandRenalDrugsAdvisoryCommittee/UCM421612.pdf](http://www.fda.gov/downloads/AdvisoryCommittees/CommitteesMeetingMaterials/Drugs/CardiovascularandRenalDrugsAdvisoryCommittee/UCM421612.pdf).
